# Supplementary material for: Usability Testing of a Reusable Pulse Oximeter Probe Developed for Health-Care Workers Caring for Children < 5 Years Old in Low-Resource Settings
Source: PubMed Central journal article supplement (PMC6159595; doi:10.4269/ajtmh.18-0016), 2018-08-20
Supplement: tpmd180016.SD1.pdf [file tpmd180016.SD1.pdf]

Supplemental table 1. Stratification of unsuccessful SpO<sub>2</sub> readings by time and biological implausibility.

| Testing round                  |         | Total SpO <sub>2</sub> tests | Unsuccessful (>5 minutes) | Unsuccessful (biologically implausible) |
|--------------------------------|---------|------------------------------|---------------------------|-----------------------------------------|
| Cumulative                     | Overall | 1307                         | 50 (4%)                   | 76 (6%)                                 |
|                                | Expert  | 689                          | 29 (4%)                   | -                                       |
|                                | HCW     | 618                          | 21 (3%)                   | 76 (12%)                                |
| Round 1 (Malawi)               | Overall | 416                          | 21 (5%)                   | 20 (5%)                                 |
|                                | Expert  | 211                          | 11 (5%)                   | -                                       |
|                                | HCW     | 205                          | 10 (5%)                   | 20 (10%)                                |
| Round 2 (Bangladesh)           | Overall | 400                          | 0                         | 55 (14%)                                |
|                                | Expert  | 198                          | 0                         | -                                       |
|                                | HCW     | 202                          | 0                         | 55 (27%)                                |
| Round 3 (United Kingdom)       | Overall | 430                          | 29 (7%)                   | 1 (0.2%)                                |
|                                | Expert  | 219                          | 18 (8%)                   | -                                       |
|                                | HCW     | 211                          | 11 (5%)                   | 1 (0.5%)                                |
| Round 4 (Malawi – expert only) | Overall | 61                           | 0                         | -                                       |

SpO<sub>2</sub> indicates non-invasive arterial oxyhemoglobin saturation.
